# Supplementary material for: Hagfish: Champions of CO2 tolerance question the origins of vertebrate gill function
Source: PubMed Central journal article supplement (PMC4460890; doi:10.1038/srep11182), 2015-06-09
Supplement: srep11182-s1.pdf [file srep11182-s1.pdf]

1 **Title: Hagfish: Champions of CO<sub>2</sub> tolerance question the origins of vertebrate gill function**

2 Authors: D.W. Baker\*, B.A. Sardella, J.L. Rummer, M. Sackville and C.J. Brauner

3

4

5 **Supplementary Information:**

6 **Methods:**

7 **Experimental Animals**

8 Pacific hagfish (*Eptatretus stoutii*; 100-400g) were captured using baited traps placed at a  
9 depth of 100 meters in Barkley Sound, west of Vancouver Island, British Columbia (B.C.),  
10 Canada. These traps were transported to the Bamfield Marine Science Centre, Bamfield, B.C.,  
11 Canada, where animals were transferred to opaque, covered, flow-through seawater tanks (12  
12 °C) for 1-2 weeks prior to experiments. Hagfish were fed freshly killed salmon weekly.

13 **Experimental Protocol**

14 The night prior to experiments, hagfish were carefully transferred under water (to  
15 minimize stress and slime production) into 4 l clear plastic containers. Containers were  
16 transferred to a wet table, plumbed with flow-through seawater (12°C), and animals were  
17 allowed to acclimate for 24 h. Animals were not fed during this time. Following overnight  
18 acclimation, the containers were supplied with re-circulating seawater pumped from a header  
19 tank previously equilibrated with approximately 10, 30 and 50 mm Hg pCO<sub>2</sub> accomplished using  
20 a Cameron, Model 250 gas mixer and verified using a thermostatted (12°C) pCO<sub>2</sub> electrode

21 (E5036) displayed on a Radiometer PHM 73 (Radiometer Copenhagen). Animals remained  
22 coiled and motionless during these exposures. Animals were then sampled either a) immediately  
23 after transfer, time 0, or b) after 3, 6, 12, 24, 48 (only 30 and 50 mm Hg pCO<sub>2</sub>) or 96 (only 50  
24 mm Hg pCO<sub>2</sub>) h of exposure to elevated pCO<sub>2</sub>. To sample hagfish, the box was disconnected  
25 from the re-circulating system, and a concentrated solution of benzocaine (dissolved in 70%  
26 ethanol) was mixed into the box (final concentration 0.5 g benzocaine/L H<sub>2</sub>O). Animals were  
27 considered to be anaesthetized when they no longer responded to external prodding (<10 min.),  
28 and a 1ml blood sample was drawn from the caudal sinus into a heparinized syringe, and placed  
29 on ice. The animal was then quickly transferred to a surgical table, decapitated and the entire  
30 heart and sections of liver and white muscle were removed and frozen in liquid nitrogen for later  
31 measurement of intracellular pH (pHi). Tissues for buffer value assessment were collected from  
32 non-CO<sub>2</sub> exposed animals using an otherwise similar protocol.

33 Blood was removed for measurement of hematocrit, haemoglobin, and mean cell  
34 haemoglobin concentration (MCHC) as previously described<sup>29</sup>. Blood pH was measured using a  
35 thermostated capillary electrode (BMS Mark 2, Radiometer Copenhagen) and digital pH meter  
36 (PHM 73, Radiometer Copenhagen). Another blood sample (1.5 ml) was centrifuged for 3 min.  
37 at 10000 rpm and plasma total CO<sub>2</sub> (TCO<sub>2</sub>) was measured using a Corning CO<sub>2</sub> analyzer. The  
38 remaining packed red blood cell pellet was used to measure red blood cell pHi using the freeze  
39 thaw method<sup>38</sup> and the same capillary electrode as used for whole blood.

40 Frozen plasma and tissues were transported to the Department of Zoology, University of  
41 British Columbia where plasma samples were analysed for osmolarity (Vapor Point Osmometer,  
42 Westcor), [Cl<sup>-</sup>] (Digital Chloridometer, Radiometer), and [Na<sup>+</sup>], [Mg<sup>2+</sup>] and [Ca<sup>2+</sup>] (AA

43 spectrophotometer, Varion, FS240) and total protein (BSA method). Tissue pHi was measured  
44 from frozen tissues using the metabolic inhibitor method<sup>39</sup> validated for tissues from fish  
45 exposed to high pCO<sub>2</sub> tensions<sup>40</sup>.

46 Non-bicarbonate whole blood buffer capacity was determined on a caudal blood sample  
47 (4 ml) maintained in an Eschweiller thermostated (12°C) glass tonometer, equilibrated for 45  
48 min to a pCO<sub>2</sub> of 3.5, 7.5, 11, 21, and 45 mmHg using Sierra Mass flow controllers that mixed  
49 air and CO<sub>2</sub> (n=4 for each CO<sub>2</sub> level). At each CO<sub>2</sub> tension, blood was removed and TCO<sub>2</sub> and  
50 pH were measured as described above. Tissue non-bicarbonate buffer capacity was determined  
51 as described previously<sup>29</sup>. Tissue homogenates (n=4) were equilibrated at 2, 7.5, 15 and 30 mm  
52 Hg pCO<sub>2</sub> and sampled at each CO<sub>2</sub> level for pH and TCO<sub>2</sub>. Tissue water fraction was determined  
53 for calculation of intracellular fluid based on the difference between wet mass and dry mass  
54 (following drying to constant weight), which were compared well with previously reported  
55 values. CO<sub>2</sub> solubility constants and pK' were calculated using previously derived equations<sup>41</sup>. In  
56 both cases, intrinsic non-bicarbonate buffer capacity ( $\beta_{\text{NB}}$ ) was calculated from the slope of  
57  $\Delta[\text{HCO}_3^-] \Delta\text{pH}^{-1}$ , and then expressed in mmol  $[\text{HCO}_3^-] \text{pH}^{-1} \text{ l}^{-1}$  of blood or  $\text{kg}^{-1}$  of intracellular  
58 tissue water, over an *in vivo* relevant pH range.

59 An estimate of the increase in whole animal net acid excretion rates in hagfish was  
60 calculated for comparison with other species (Supplementary Table 1) as the inverse of the net  
61 increase in whole body  $[\text{HCO}_3^-]$  following CO<sub>2</sub> exposure relative to pre-exposure (i.e., time 0)  
62 values as has been done previously for other aquatic species<sup>29,31</sup>. The hagfish was simplified to a  
63 two compartment model consisting of 33% extracellular fluid<sup>42</sup>; assumed to be similar in  
64 composition to plasma) and 67% intracellular fluid (assumed to be similar in composition to

65 parietal muscle which makes up the largest volume of the animal). Plasma  $[\text{HCO}_3^-]$  was  
66 calculated as above and parietal  $[\text{HCO}_3^-]$  was calculated based upon previous work<sup>29,31</sup>. Briefly,  
67 buffer capacity and pH and  $\text{HCO}_3^-$  at normocapnia (i.e., control values) of the parietal muscle  
68 was used to calculate pH and  $[\text{HCO}_3^-]$  values during passive equilibrium of the tissue with  
69 treatment  $\text{CO}_2$  levels. Then, pH change and  $\text{HCO}_3^-$  accumulation were calculated as the  
70 difference between these estimates and the measured pH and calculated  $[\text{HCO}_3^-]$  values at 3 and  
71 24 h. The rate of net acid excretion during exposure to 30 and 50 mm Hg  $\text{pCO}_2$  respectively is  
72 1.2 and 1.4  $\text{mmol h}^{-1} \text{kg}^{-1}$  body water at 3 h (Supplementary Table 1). Most of the increase in  
73  $\text{HCO}_3^-$  at this time point is in the intracellular compartment. When calculated at 24 h, net acid  
74 excretion rates remained high (0.8 and 0.61  $\text{mmol h}^{-1} \text{kg}^{-1}$  body water at 30 and 50 mm Hg  $\text{pCO}_2$   
75 respectively), but a much greater proportion of  $\text{HCO}_3^-$  was in the extracellular space at this time.  
76 Overall, net acid excretion rates in hagfish were similar to those determined in other fish  
77 (Supplementary Table 1).

78 It is important to note that this method likely underestimates net acid excretion at two  
79 levels. First, using parietal muscle as a proxy for the whole animal results in a conservative  
80 estimate of acid excretion because a) this tissue demonstrated the slowest rate of  $\text{HCO}_3^-$   
81 accumulation and the smallest degree of pH compensation of all tissues measured, partially due  
82 to its high buffer capacity, and b) the method with which we obtained buffer capacity in muscle  
83 is known to overestimate intracellular buffering<sup>42</sup>. Second, we assumed that active net acid  
84 excretion began immediately after exposure to hypercarbia (i.e., time 0), which is unlikely to be  
85 the case. Thus, the high rates of net acid excretion relative to other fishes reported in  
86 Supplementary Table 1 are likely conservative and they are achieved in an animal with one of  
87 the lowest resting metabolic rates ever measured.

88 **Statistical Analyses**

89 Data are presented as mean  $\pm$  SEM. All statistical differences were detected using a one-way  
90 ANOVA and, when necessary, a post-hoc Dunnett's test. All statistical analyses were conducted  
91 using SigmaStat for Windows 3.5.0.54 (Systat Software, Inc., 2006), and all analyses were  
92 interpreted using  $\alpha = 0.05$  to determine statistical significance.

93

94

95  
96  
97  
98  
99

**Supplementary Table 1:** Summary of calculated net acid excretion rate in aquatic fishes listed approximately from most basal to most derived.

| Species                                              | Net Acid Excretion Rate<br>(mmol h <sup>-1</sup> kg <sup>-1</sup> ) | Origin of Acidosis     | Medium |
|------------------------------------------------------|---------------------------------------------------------------------|------------------------|--------|
| <i>Eptatretus stoutii</i> *†                         | 0.9-1.4 <sup>a</sup>                                                | 1.5-6% CO <sub>2</sub> | SW     |
| <i>Eptatretus stoutii</i> <sup>16</sup> †            | ~ 0.9 <sup>b</sup>                                                  | acid infusion          | SW     |
| <i>Myxine glutinosa</i> <sup>14</sup> †              | ~ 0.85 <sup>b</sup>                                                 | 5% CO <sub>2</sub>     | SW     |
| <i>Myxine glutinosa</i> <sup>15</sup> †              | ~0.6 <sup>b</sup>                                                   | acid infusion          | FW     |
| <i>Acipenser transmontanus</i> <sup>29</sup> ††      | 0.6-1.6 <sup>a</sup>                                                | 1.5-6%                 | FW     |
| <i>Pterygoplichthys pardalis</i> <sup>31</sup> ††    | 0.7-1.4 <sup>a</sup>                                                | 2-4% CO <sub>2</sub>   | FW     |
| <i>Petromyzon marinus</i> <sup>43</sup>              | ~ 0.5 <sup>b</sup>                                                  | exhaustive exercise    | FW     |
| <i>Scyliorhinus stellaris</i> <sup>44</sup> ‡        | ~ 0.6 <sup>b</sup>                                                  | 1% CO <sub>2</sub>     | SW     |
| <i>Conger conger</i> <sup>45</sup>                   | ~ 0.6 <sup>b</sup>                                                  | 1% CO <sub>2</sub>     | SW     |
| <i>Opsanus beta</i> <sup>46</sup>                    | ~ 0.5 <sup>b</sup>                                                  | 5% CO <sub>2</sub>     | SW     |
| <i>Myoxocephalus octodecimspinosus</i> <sup>47</sup> | ~0.5 <sup>b</sup>                                                   | acid infusion          | SW     |
| <i>Carpus carpio</i> <sup>48</sup>                   | ~ 0.2 <sup>b</sup>                                                  | 1% CO <sub>2</sub>     | FW     |

100 \*present study  
 101 † *E. stoutii* and *Myxine glutinosa* are osmo- and ionoconforming vertebrates.  
 102 ‡ *S. stellaris* is an ionoregulating and osmoconforming vertebrate.  
 103 †† *Acipenser transmontanus* and *Pterygoplichthys pardalis* are preferential pHi regulators, able to protect  
 104 tissue pHi while blood pH is severely depressed.  
 105 a. Estimated from values of buffering capacity and net HCO<sub>3</sub><sup>-</sup> accumulation (see supplemental text).  
 106 b. Estimated from the difference between net ammonia and titratable acidity excretion rates in  
 107 surrounding aquatic environment (net acid flux).  
 108

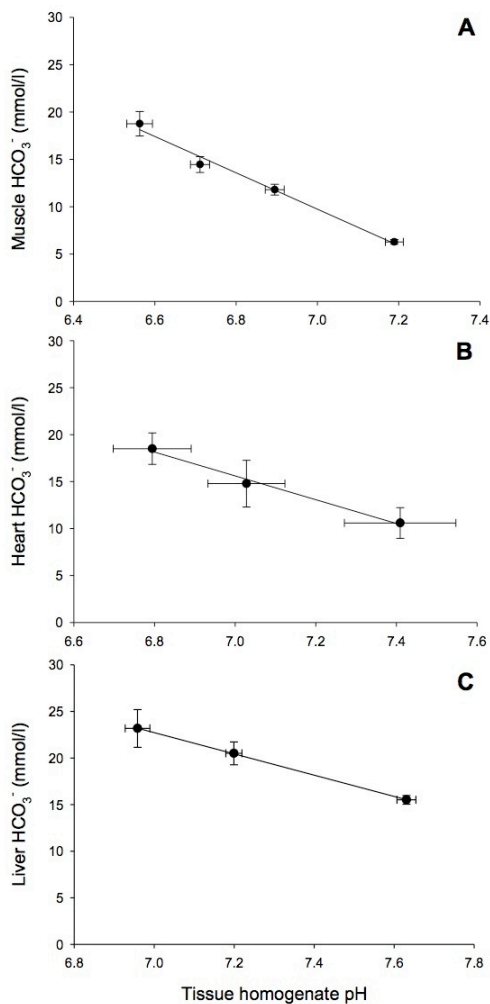

110

111 **Supplementary Figure 1:** The relationship between pH and [HCO<sub>3</sub><sup>-</sup>] of tissue homogenates  
 112 from the Pacific hagfish at different CO<sub>2</sub> tensions. Values are means ± SEM. Intrinsic (i.e., non-  
 113 bicarbonate) buffer capacities were calculated as the following: parietal muscle = 29.3, entire  
 114 heart = 22.5, and liver = 16.7 mmol HCO<sub>3</sub><sup>-</sup> pH<sup>-1</sup> kg<sup>-1</sup> intracellular water. These values were  
 115 calculated from best-fit linear regression and using estimates of extra- and intracellular tissue  
 116 water for *E. stoutii* from previous work<sup>45</sup>.
